# Supplementary material
Source: PubMed Central journal article supplement (PMC3732019)
Supplement: supp_kws458_kws458_Web_Material.pdf [file supp_kws458_kws458_Web_Material.pdf]

## Web Appendix 1: SUPPLEMENTARY METHODS

Shanghai study (present case-control study)

Haplotyping of the *ABO* SNPs rs8176746 and rs8176719 is shown in Table 1 in the paper. Two SNPs allow nine possible genotypes, of which six identify the common alleles of the four *ABO* blood group phenotypes. Only the one compound heterozygote genotype rs8176746 AC × rs8176719 GD (“D” = deletion) requires phase determination. The haplotypes AG and CD identify the common *B* and *O* alleles, respectively. The reverse haplotypes AD and CG correspond to alleles *O*<sub>24</sub>, *O*<sub>41</sub> or *O*<sub>42</sub>, and common *A* (*A101*), respectively (1). Four studies of *O* alleles in Chinese Han populations have not found any of these *O* alleles in more than 700 individuals (2-5), nor have they been seen in four studies totaling more than 1,300 Japanese or Korean individuals (6-9). In our data, of 1,415 individuals with unambiguous haplotypes (i.e., all except compound heterozygotes), aside from the common *ABO* allele types, we observed one case and one control with rs8176746 AA × rs8176719 GD genotype, giving haplotypes AG and AD, corresponding to alleles *B* and *O*<sub>24</sub>, *O*<sub>41</sub> or *O*<sub>42</sub>, respectively. We conclude that these *O* alleles are rare in the Han Chinese population and thus that essentially all of the compound heterozygote genotype individuals carry haplotypes AG and CD and therefore common alleles *B* and *O*.

Meta-analysis—Shanghai and Heidelberg Studies

Four studies involved participants in Shanghai, China (Wang et al. (10) was carried out in Guangzhou, in southern China, and Gong et al. (11) in Beijing). The study by Zhou and Li (12) recruited pancreatic cancer patients diagnosed in three Shanghai military-affiliated hospitals,

Changhai Hospital, Eastern Hepatobiliary Surgery Hospital, and Changzheng Hospital, from 6/1/1993-5/31/2001. Participants were resident in eastern China (Jiangsu, Zhejiang, Fujian, Jiangxi, Anhui and Shandong) and non-eastern China, not solely in Shanghai. Ben et al. (13) recruited patients diagnosed in Changhai Hospital from 1/1/2000-8/31/2009, and in the tertiary care Jiao Tong University Ruijin Hospital, from 1/1/2000-8/31/2008. Some overlap of cases may have occurred in these two studies, though the numbers are likely small. The PanScan study (14) involved 12 cohorts, one of which was carried out in urban Shanghai. This cohort recruited 140,000 Shanghai residents in 1996-2000 and followed them for about 8 years. There may be some case overlap with the two previous studies, though the Shanghai cohort comprises only a small fraction of the total PanScan cohort, thus the overlap is probably minor. Finally, the present study recruited pancreatic cancer patients resident in Shanghai diagnosed in the city's 37 major hospitals from 12/1/2006-1/31/2011. Some overlap with Ben et al. (13) is possible, as with the Shanghai cohort study subjects included in Wolpin et al. (14), though because the Shanghai cohort includes less than 2% of the general older population of Shanghai permanent residents, the overlap is again likely to be small. Given that all of the study overlaps are probably minimal, we have included all four studies in the meta-analysis.

Two studies involved substantially the same pancreatic cancer patients from the University of Heidelberg. Rizzato et al. (15) included surgical patients diagnosed from 1996-2009, and examined ABO genotype only through GWAS genotyping of rs505922 which distinguishes non-O from O blood group. Rahbari et al. (16) included surgical patients diagnosed from 2001-2008 but obtained ABO blood group information from existing medical records. Rizzato et al. (15) was limited to subjects with existing DNA samples and thus included fewer cases than Rahbari et al. (16). We have therefore chosen to include the Heidelberg

subjects only from the Rahbari et al. (16) study. Also included in the analysis of Rizzato et al. (15) were cases from Liverpool, England, and comparable English controls. Those subjects have been included in our meta-analysis.

#### REFERENCES FOR SUPPLEMENTARY METHODS

1. Patnaik SK, Helmberg W, Blumenfeld OO. BGMUT: NCBI dbRBC database of allelic variations of genes encoding antigens of blood group systems. *Nucleic Acids Res* 2012;40(1):D1023-D1029.
2. Roubinet F, Despiau S, Calafell F, et al. Evolution of the O alleles of the human ABO blood group gene. *Transfusion* 2004;44(5):707-715.
3. Yang BC, Zeng JQ, Yu Q, et al. Molecular polymorphism of O alleles in the Chinese Han population. *Ann Clin Lab Sci* 2007;37(1):71-74.
4. Yip SP. Single-tube multiplex PCR-SSCP analysis distinguishes 7 common ABO alleles and readily identifies new alleles. *Blood* 2000;95(4):1487-1492.
5. Zhu F, Tao S, Xu X, et al. Distribution of ABO blood group allele and identification of three novel alleles in the Chinese Han population. *Vox Sang* 2010;98(4):554-559.
6. Fukumori Y, Ohnoki S, Shibata H, et al. Suballeles of the ABO blood group system in a Japanese population. *Hum Hered* 1996;46(2):85-91.
7. Kang SH, Fukumori Y, Ohnoki S, et al. Distribution of ABO genotypes and allele frequencies in a Korean population. *Jpn J Hum Genet* 1997;42(2):331-335.
8. Kobayashi K, Iwasaki M, Anan K, et al. An analysis of polymorphism for the ABO blood group genes in a Japanese population based on polymerase chain reaction. *Anthropol Sci*

1999;107(2):109-121.

9. Ogasawara K, Yabe R, Uchikawa M, et al. Molecular genetic analysis of variant phenotypes of the ABO blood group system. *Blood* 1996;88(7):2732-2737.
10. Wang D-S, Chen D-L, Ren C, et al. ABO blood group, hepatitis B viral infection and risk of pancreatic cancer. *Int J Cancer* 2012;131:461-468.
11. Gong Y, Yang Y-S, Zhang X-M, et al. ABO blood type, diabetes and risk of gastrointestinal cancer in northern China. *World J Gastroenterol* 2012;18(6):563-569.
12. Zhou G-Z, Li Z-S. Clinical epidemiological research on pancreatic cancer: an analysis of 1027 cases. *World Chin J Digestol* 2005;13(1):55-60.
13. Ben Q, Wang K, Yuan Y, et al. Pancreatic cancer incidence and outcome in relation to ABO blood groups among Han Chinese patients: a case-control study. *Int J Cancer* 2011;128(5):1179-1186.
14. Wolpin BM, Kraft P, Gross M, et al. Pancreatic cancer risk and ABO blood group alleles: results from the pancreatic cancer cohort consortium. *Cancer Res* 2010;70(3):1015-1023.
15. Rizzato C, Campa D, Giese N, et al. Pancreatic cancer susceptibility loci and their role in survival. *PLoS ONE* 2011;6(11):e27921.
16. Rahbari NN, Bork U, Hinz U, et al. ABO blood group and prognosis in patients with pancreatic cancer. *BMC Cancer* 2012;12:319. doi:10.1186/1471-2407-12-319.

**Web Table 1.** Characteristics of Case Patients With Pancreatic Cancer and Normal Population Control Subjects in Urban Shanghai, 2006-2011. Values are Numbers (%) of Participants Unless Indicated Otherwise.

| Characteristic          | All Cases<br>(n=890) | All Controls<br>(n=1067) | <i>P</i> value | Successfully<br>Genotyped<br>Cases (n=846) | Successfully<br>Genotyped<br>Controls (n=971) | <i>P</i> value |
|-------------------------|----------------------|--------------------------|----------------|--------------------------------------------|-----------------------------------------------|----------------|
| Age, years, mean (SD)   | 64.9 (9.6)           | 65.1 (9.9)               | 0.40           | 64.8 (9.7)                                 | 65.1 (10.0)                                   | 0.53           |
| Gender                  |                      |                          |                |                                            |                                               |                |
| Male                    | 517 (58.1)           | 605 (56.7)               | 0.54           | 492 (58.2)                                 | 557 (57.4)                                    | 0.73           |
| Female                  | 373 (41.9)           | 462 (43.3)               |                | 354 (41.8)                                 | 414 (42.6)                                    |                |
| Education               |                      |                          |                |                                            |                                               |                |
| Primary school or lower | 171 (19.2)           | 208 (19.5)               | 0.45           | 162 (19.1)                                 | 183 (18.8)                                    | 0.57           |
| Middle school           | 525 (59.0)           | 651 (61.0)               |                | 500 (59.1)                                 | 595 (61.3)                                    |                |
| College or higher       | 194 (21.8)           | 208 (19.5)               |                | 184 (21.8)                                 | 193 (19.9)                                    |                |
| Regular alcohol use     |                      |                          |                |                                            |                                               |                |
| No                      | 493 (55.4)           | 555 (52.0)               | 0.14           | 468 (55.3)                                 | 499 (51.4)                                    | 0.094          |
| Yes                     | 397 (44.6)           | 512 (48.0)               |                | 378 (44.7)                                 | 472 (48.6)                                    |                |
| Tobacco use             |                      |                          |                |                                            |                                               |                |
| Never                   | 493 (55.4)           | 626 (58.7)               | 0.30           | 467 (55.2)                                 | 563 (58.0)                                    | 0.43           |
| Former                  | 123 (13.8)           | 144 (13.5)               |                | 118 (13.9)                                 | 134 (13.8)                                    |                |
| Current                 | 274 (30.8)           | 297 (27.8)               |                | 261 (30.9)                                 | 274 (28.2)                                    |                |

**Web Table 2.** Characteristics of Studies Included in Meta-analysis of ABO Blood Group and Risk of Pancreatic Cancer.

| Reference <sup>a</sup>              | Location                                                      | CagA<br>En-<br>demic <sup>b</sup> | O<br>Cases | Non-O<br>Cases | O<br>Controls | Non-O<br>Controls | Relative<br>Weight<br>(%) <sup>c</sup> | ABO Determination              | Cancer Diagnosis         | Type of Controls                                                                                                            |
|-------------------------------------|---------------------------------------------------------------|-----------------------------------|------------|----------------|---------------|-------------------|----------------------------------------|--------------------------------|--------------------------|-----------------------------------------------------------------------------------------------------------------------------|
| Walther et al. 1956 (5)             | London, UK                                                    | No                                | 4          | 9              | 1,070         | 1,255             | 0.41                                   | Seroagglutination <sup>d</sup> | Histopathologic          | Local volunteer blood donors                                                                                                |
| Aird et al. 1960 (28)               | 11 UK centers                                                 | No                                | 272        | 348            | 29,907        | 32,893            | 7.05                                   | Seroagglutination <sup>d</sup> | Not Applicable           | Local volunteer blood donors                                                                                                |
| Moniwa 1960 (29)                    | Sendai, Japan                                                 | Yes                               | 20         | 45             | 6,769         | 14,430            | 1.76                                   | Seroagglutination <sup>d</sup> | Surgical/Radiologic      | Middle-school students                                                                                                      |
| Macafee 1964 (19)                   | Belfast, UK                                                   | No                                | 56         | 63             | 5,522         | 5,805             | 3.17                                   | Seroagglutination <sup>d</sup> | Laparotomy/Autopsy       | Belfast volunteer blood donors                                                                                              |
| Rai et al. 1972 (30)                | Patiala, India                                                | Yes                               | 3          | 3              | 1,409         | 2,866             | 0.23                                   | Seroagglutination              | Histopathologic          | Random population sample                                                                                                    |
| Newell et al. 1974 (18)<br>(blacks) | New Orleans, US                                               | Yes                               | 47         | 67             | 1,809         | 1,954             | 2.85                                   | Seroagglutination <sup>d</sup> | Histopathologic/clinical | Friends/relatives of general hospital patients                                                                              |
| Newell et al. 1974 (18)<br>(whites) | New Orleans, US                                               | No                                | 13         | 10             | 585           | 647               | 0.80                                   | Seroagglutination <sup>d</sup> | Histopathologic/clinical | Friends/relatives of general hospital patients                                                                              |
| Mikhailichenko 1976 (31)            | Donetsk, Ukraine                                              | No                                | 130        | 445            | 955           | 1,816             | 5.78                                   | Seroagglutination <sup>d</sup> | Histopathologic          | Paid local volunteer blood donors                                                                                           |
| Annese et al. 1990 (32)             | Rome, Italy                                                   | No                                | 79         | 145            | 3,519         | 3,801             | 4.41                                   | Seroagglutination <sup>d</sup> | Histopathologic          | Local volunteer blood donors                                                                                                |
| Vioque and Walker 1991<br>(33)      | US, Scotland, Israel,<br>West Germany, New<br>Zealand, Canada | No                                | 32         | 56             | 104           | 119               | 2.12                                   | Seroagglutination <sup>d</sup> | Histopathologic/clinical | Hospital patients with non ABO-related diseases, matched on age, sex, race, hospital                                        |
| Guleria et al. 2005 (34)            | Punjab, India                                                 | Yes                               | 2          | 6              | 48            | 112               | 0.22                                   | Seroagglutination <sup>d</sup> | Histopathologic          | Volunteer blood donors                                                                                                      |
| Zhou and Li 2005 (25)               | Shanghai Military<br>Hospitals, China                         | Yes                               | 215        | 476            | 354           | 845               | 5.94                                   | Seroagglutination <sup>d</sup> | Hospital records         | Non-cancer outpatients frequency matched on gender, dates of birth and hospital visit, region of residence, marriage status |
| Greer et al. 2010 (35)              | Pittsburgh, US                                                | No                                | 88         | 186            | 311,795       | 397,047           | 4.84                                   | Seroagglutination              | Histopathologic/clinical | Local volunteer blood donors over 30 years of age                                                                           |
| Iodice et al. 2010 (11,12)          | Milan, Italy                                                  | No                                | 26         | 64             | 7,099         | 8,156             | 2.25                                   | Seroagglutination <sup>d</sup> | Histopathologic          | All non-pancreatic cancers, adjusted                                                                                        |

|                                       |                                              |     |     |       |       |       |      |                                |                          |                                                                                                                                              |                                                        |
|---------------------------------------|----------------------------------------------|-----|-----|-------|-------|-------|------|--------------------------------|--------------------------|----------------------------------------------------------------------------------------------------------------------------------------------|--------------------------------------------------------|
|                                       |                                              |     |     |       |       |       |      |                                |                          |                                                                                                                                              | to the "AVIS" distribution of Italian ABO blood groups |
| Low et al. 2010 (36)                  | Tokyo and Osaka, Japan                       | Yes | 266 | 725   | 1,574 | 3,635 | 7.22 | rs505922                       | Histopathologic/clinical | Club and staff volunteers, plus biobank subjects with various non-cancer, non-diabetes diseases                                              |                                                        |
| Risch et al. 2010 (9)                 | Connecticut, US                              | No  | 147 | 214   | 315   | 375   | 4.71 | Seroagglutination              | Histopathologic/clinical | Population, frequency matched on age, gender                                                                                                 |                                                        |
| Wolpin et al. 2010 (27)               | Mixed US, Europe, Shanghai                   | No  | 511 | 1,023 | 657   | 926   | 8.11 | rs505922, rs8176746            | Not stated               | Non-cancer cohort members matched on age, gender, race/ethnicity, etc.                                                                       |                                                        |
| Ben et al. 2011 (26)                  | Shanghai Military and other Hospitals, China | Yes | 409 | 1,022 | 479   | 970   | 6.98 | Seroagglutination <sup>d</sup> | Histopathologic          | Non-cancer acute-care patients with traumatic, eye, surgical, and other admissions, non-tobacco and non-alcohol related, matched on age, sex |                                                        |
| Nakao et al. 2011 (7)                 | Nagoya, Japan                                | Yes | 38  | 147   | 428   | 1,037 | 4.40 | rs8176719, rs8176746           | Histopathologic/clinical | Non-cancer hospital outpatients                                                                                                              |                                                        |
| Rizzato et al. 2011 (15) <sup>e</sup> | Liverpool, England                           | No  | 38  | 71    | 60    | 76    | 1.77 | rs505922                       | Surgical resection       | EPIC Study non-cancer England cohort members                                                                                                 |                                                        |
| Engin et al. 2012 (37)                | Zonguldak, Turkey                            | Yes | 39  | 93    | 111   | 239   | 2.43 | Seroagglutination <sup>d</sup> | Histopathologic/clinical | Non-cancer hospital outpatients                                                                                                              |                                                        |
| Gong et al. 2012 (24)                 | PLA Hospital, Beijing, China                 | Yes | 183 | 479   | 232   | 513   | 4.44 | Seroagglutination              | Histopathologic/clinical | Non-cancer hospital outpatients                                                                                                              |                                                        |
| Rahbari et al. 2012 (38) <sup>e</sup> | Heidelberg, Germany                          | No  | 196 | 431   | 4,972 | 8,072 | 6.69 | Seroagglutination <sup>d</sup> | Surgical resection       | Surgery patients without pancreatic cancer                                                                                                   |                                                        |
| Wang et al. 2012 (23)                 | Guangzhou, China                             | Yes | 228 | 399   | 300   | 411   | 5.50 | Seroagglutination              | Histopathologic          | Hospital non-cancer patients with gallbladder polyps, polycystic kidney, breast fibroadenoma, uterine fibroids, etc., matched on age, gender |                                                        |
| Risch et al. (this study)             | Shanghai, China                              | Yes | 221 | 625   | 308   | 663   | 5.91 | rs8176719,                     | Histopathologic          | Population, frequency matched on                                                                                                             |                                                        |

<sup>a</sup> Reference numbers are for the publications as listed in the References section of the paper.

<sup>b</sup> Populations with high frequency of colonization by CagA-positive *Helicobacter pylori* strains. See text for additional details.

<sup>c</sup> Random effects meta-analysis relative weight for studies comparing non-O to O blood groups.

<sup>d</sup> Presumed seroagglutination, though not mentioned in original article.

<sup>e</sup> The report by Rizzato et al. (15) included cases from both Liverpool and Heidelberg, genotyped only for rs505922. The study by Rahbari et al. (38) involved a larger group of the Heidelberg cases having major overlap with the German cases in Rizzato et al. (15), but included full ABO blood group determination. See text and Web Appendix 1 for additional details.

**Web Table 3.** Odds-Ratio Changes With Individual Studies Removed, Studies Included in Meta-analysis of ABO Blood Group and Risk of Pancreatic Cancer.

| Analysis                                     | A OR         | A 95% CI            | B OR         | B 95% CI            | AB OR        | AB 95% CI           | Non-O OR     | Non-O 95% CI        |
|----------------------------------------------|--------------|---------------------|--------------|---------------------|--------------|---------------------|--------------|---------------------|
| <b>Complete Analysis, All Studies</b>        | <b>1.400</b> | <b>1.282, 1.528</b> | <b>1.191</b> | <b>1.050, 1.351</b> | <b>1.288</b> | <b>1.098, 1.510</b> | <b>1.309</b> | <b>1.211, 1.414</b> |
| Minimum<br>Min. Δ% from<br>complete analysis | 1.360        |                     | 1.157        |                     | 1.243        |                     | 1.286        |                     |
| Maximum<br>Max. Δ% from<br>complete analysis | -2.87%       |                     | -2.87%       |                     | -3.51%       |                     | -1.74%       |                     |
|                                              | 1.426        |                     | 1.245        |                     | 1.338        |                     | 1.337        |                     |
|                                              | 1.88%        |                     | 4.49%        |                     | 3.92%        |                     | 2.14%        |                     |
| <b>Complete Analysis, non-Endemic</b>        | <b>1.424</b> | <b>1.240, 1.635</b> | <b>1.379</b> | <b>1.160, 1.640</b> | <b>1.515</b> | <b>1.241, 1.849</b> | <b>1.407</b> | <b>1.261, 1.569</b> |
| Minimum<br>Min. Δ% from<br>complete analysis | 1.357        |                     | 1.324        |                     | 1.455        |                     | 1.370        |                     |
| Maximum<br>Max. Δ% from<br>complete analysis | -4.69%       |                     | -4.01%       |                     | -3.98%       |                     | -2.63%       |                     |
|                                              | 1.476        |                     | 1.457        |                     | 1.607        |                     | 1.463        |                     |
|                                              | 3.62%        |                     | 5.66%        |                     | 6.06%        |                     | 4.03%        |                     |
| <b>Complete Analysis, Endemic</b>            | <b>1.361</b> | <b>1.237, 1.498</b> | <b>1.047</b> | <b>0.918, 1.195</b> | <b>1.125</b> | <b>0.916, 1.382</b> | <b>1.199</b> | <b>1.106, 1.301</b> |
| Minimum<br>Min. Δ% from<br>complete analysis | 1.320        |                     | 1.016        |                     | 1.035        |                     | 1.177        |                     |
| Maximum<br>Max. Δ% from<br>complete analysis | -3.02%       |                     | -2.99%       |                     | -8.01%       |                     | -1.85%       |                     |
|                                              | 1.417        |                     | 1.117        |                     | 1.177        |                     | 1.245        |                     |
|                                              | 4.13%        |                     | 6.68%        |                     | 4.64%        |                     | 3.84%        |                     |

Abbreviations: OR, odds ratio; 95% CI, 95% confidence interval; Δ, change in value.

**Web Table 4.** HW *P* Values and ABO Phenotype Frequencies by Ethnicity, Studies Included in Meta-analysis of ABO Blood Group and Risk of Pancreatic Cancer.

| Reference <sup>a</sup>           | Location                                                         | Cases<br>HW <i>P</i><br>value | Controls<br>HW <i>P</i><br>value | CagA<br>En-<br>demic <sup>b</sup> | Comparison<br>Population | Cases |       |       |       | Controls |       |       |       |
|----------------------------------|------------------------------------------------------------------|-------------------------------|----------------------------------|-----------------------------------|--------------------------|-------|-------|-------|-------|----------|-------|-------|-------|
|                                  |                                                                  |                               |                                  |                                   |                          | A %   | B %   | AB %  | O %   | A %      | B %   | AB %  | O %   |
| Walther et al. 1956 (5)          | London, UK                                                       | 0.560                         | 0.543                            | No                                | White-European           | 61.5% | 0.0%  | 7.7%  | 30.8% | 44.0%    | 6.8%  | 3.1%  | 46.0% |
| Aird et al. 1960 (28)            | 11 UK centers                                                    | 0.718                         | 0.679                            | No                                | White-European           | 46.0% | 7.6%  | 2.6%  | 43.9% | 40.5%    | 8.9%  | 3.0%  | 47.6% |
| Moniwa 1960 (29)                 | Sendai, Japan                                                    | 0.914                         | 0.304                            | Yes                               | Japan                    | 44.6% | 16.9% | 7.7%  | 30.8% | 36.7%    | 22.8% | 8.6%  | 31.9% |
| Macafee 1964 (19)                | Belfast, UK                                                      | NA <sup>c</sup>               | NA <sup>c</sup>                  | No                                | White-European           | 30.3% | 22.7% | 0.0%  | 47.1% | 37.0%    | 14.2% | 0.0%  | 48.8% |
| Rai et al. 1972 (30)             | Patiala, India                                                   | 0.773                         | 0.476                            | Yes                               | India                    | 16.7% | 33.3% | 0.0%  | 50.0% | 21.8%    | 37.3% | 7.9%  | 33.0% |
| Newell et al. 1974 (blacks) (18) | New Orleans, US                                                  | 0.657                         | 0.942                            | Yes                               | Black-American           | 30.7% | 23.7% | 4.4%  | 41.2% | 25.0%    | 22.2% | 4.7%  | 48.1% |
| Newell et al. 1974 (whites) (18) | New Orleans, US                                                  | 0.279                         | 0.459                            | No                                | White-European           | 34.8% | 0.0%  | 8.7%  | 56.5% | 40.0%    | 8.6%  | 3.9%  | 47.5% |
| Mikhailichenko 1976 (31)         | Donetsk, Ukraine                                                 | 0.765                         | 0.362                            | No                                | White-European           | 50.3% | 16.7% | 10.4% | 22.6% | 36.4%    | 20.0% | 9.1%  | 34.5% |
| Annese et al. 1990 (32)          | Rome, Italy                                                      | 0.586                         | 0.840                            | No                                | White-European           | 41.1% | 18.3% | 5.4%  | 35.3% | 36.9%    | 11.4% | 3.6%  | 48.1% |
| Vioque and Walker 1991 (33)      | US, Scotland,<br>Israel, West<br>Germany, New<br>Zealand, Canada | 0.856                         | 0.554                            | No                                | White-European           | 52.3% | 8.0%  | 3.4%  | 36.4% | 44.4%    | 5.4%  | 3.6%  | 46.6% |
| Guleria et al. 2005 (34)         | Punjab, India                                                    | 0.588                         | 0.816                            | Yes                               | India                    | 25.0% | 50.0% | 0.0%  | 25.0% | 13.8%    | 47.5% | 8.8%  | 30.0% |
| Zhou and Li 2005 (25)            | Shanghai Military<br>Hospitals, China                            | 0.589                         | 0.613                            | Yes                               | China                    | 33.7% | 24.3% | 10.9% | 31.1% | 28.9%    | 30.3% | 11.3% | 29.5% |
| Greer et al. 2010 (35)           | Pittsburgh, US                                                   | 0.766                         | 0.009                            | No                                | White-European           | 47.8% | 13.9% | 6.2%  | 32.1% | 39.1%    | 12.3% | 4.6%  | 44.0% |
| Iodice et al. 2010 (11,12)       | Milan, Italy                                                     | 0.557                         | 0.505                            | No                                | White-European           | 52.2% | 14.4% | 4.4%  | 28.9% | 41.6%    | 8.9%  | 3.0%  | 46.5% |
| Risch et al. 2010 (9)            | Connecticut, US                                                  | 0.556                         | 0.428                            | No                                | White-European           | 41.0% | 11.9% | 6.4%  | 40.7% | 40.0%    | 11.7% | 2.6%  | 45.7% |
| Wolpin et al. 2010 (27)          | Mixed US, Europe,<br>Shanghai                                    | 0.592                         | 0.502                            | No                                | White-European           | 45.6% | 14.7% | 6.3%  | 33.3% | 40.6%    | 12.3% | 5.6%  | 41.5% |
| Ben et al. 2011 (26)             | Shanghai Military<br>and other Hospitals,<br>China               | 0.841                         | 0.834                            | Yes                               | China                    | 35.4% | 25.1% | 10.9% | 28.6% | 29.5%    | 28.2% | 9.3%  | 33.1% |
| Nakao et al. 2011 (7)            | Nagoya, Japan                                                    | 0.732                         | 0.819                            | Yes                               | Japan                    | 45.9% | 21.6% | 11.9% | 20.5% | 39.0%    | 22.1% | 9.6%  | 29.2% |
| Wang et al. 2012 (23)            | Guangzhou, China                                                 | 0.286                         | 0.372                            | Yes                               | China                    | 32.1% | 26.5% | 5.1%  | 36.4% | 25.6%    | 24.2% | 8.0%  | 42.2% |
| Risch et al. (this study)        | Shanghai, China                                                  | 0.654                         | 0.411                            | Yes                               | China                    | 37.7% | 25.5% | 10.6% | 26.1% | 28.5%    | 28.4% | 11.3% | 31.7% |
| Rahbari et al. (38)              | Heidelberg,<br>Germany                                           | 0.453                         | 0.780                            | No                                | White-European           | 52.3% | 11.6% | 4.8%  | 31.3% | 44.6%    | 12.1% | 5.2%  | 38.1% |
| Engin et al. 2012 (37)           | Zonguldak, Turkey                                                | 0.518                         | 0.509                            | Yes                               | Turkey                   | 51.5% | 14.4% | 4.5%  | 29.5% | 37.1%    | 20.0% | 11.1% | 31.7% |

|                                        |                                 |       |       |       |       |       |       |       |       |       |       |      |       |
|----------------------------------------|---------------------------------|-------|-------|-------|-------|-------|-------|-------|-------|-------|-------|------|-------|
| Gong et al. 2012 (24)                  | PLA Hospital,<br>Beijing, China | 0.942 | 0.871 | Yes   | China | 27.9% | 33.4% | 11.0% | 27.6% | 32.3% | 27.1% | 9.4% | 31.1% |
| <b>Totals:</b>                         |                                 |       |       |       |       |       |       |       |       |       |       |      |       |
|                                        | White-European                  | 46.6% | 13.4% | 5.8%  | 34.2% | 39.3% | 12.0% | 4.4%  | 44.3% |       |       |      |       |
|                                        | China                           | 33.9% | 26.5% | 10.0% | 29.5% | 29.0% | 28.0% | 10.0% | 33.0% |       |       |      |       |
|                                        | Japan                           | 45.6% | 20.4% | 10.8% | 23.2% | 36.9% | 22.7% | 8.6%  | 31.8% |       |       |      |       |
|                                        | India                           | 21.4% | 42.9% | 0.0%  | 35.7% | 21.6% | 37.6% | 8.0%  | 32.9% |       |       |      |       |
|                                        | Turkey                          | 51.5% | 14.4% | 4.5%  | 29.5% | 37.1% | 20.0% | 11.1% | 31.7% |       |       |      |       |
|                                        | Black-American                  | 30.7% | 23.7% | 4.4%  | 41.2% | 25.0% | 22.2% | 4.7%  | 48.1% |       |       |      |       |
| <b>Bloodbook (62)<br/>Frequencies:</b> |                                 |       |       |       |       |       |       |       |       |       |       |      |       |
|                                        | White-European                  |       |       |       |       | 40%   | 11%   | 4%    | 45%   |       |       |      |       |
|                                        | China                           |       |       |       |       | 27%   | 32%   | 13%   | 29%   |       |       |      |       |
|                                        | Japan                           |       |       |       |       | 38%   | 22%   | 10%   | 30%   |       |       |      |       |
|                                        | India                           |       |       |       |       | 22%   | 33%   | 7%    | 37%   |       |       |      |       |
|                                        | Turkey                          |       |       |       |       | 34%   | 18%   | 6%    | 43%   |       |       |      |       |
|                                        | Black-American                  |       |       |       |       | 27%   | 20%   | 4%    | 49%   |       |       |      |       |

Abbreviations: CagA, cytotoxin-associated gene A of *Helicobacter pylori*; HW, Hardy-Weinberg; NA, not applicable.

<sup>a</sup> Reference numbers are for the publications as listed in the References section of the paper.

<sup>b</sup> CagA-positive *H. pylori* endemic populations discussed in text.

<sup>c</sup> Small numbers of AB subjects combined into B group, invalidating HW calculation.
